# Supplementary material
Source: PubMed Central journal article supplement (PMC2688272)
Supplement: gb-2009-10-2-206-S1.pdf [file gb-2009-10-2-206-S1.pdf]

**Input**

Four isoforms of IFN receptor

```

>AP000295.6-001
MLLSQNAFIFRSLNLVLMVYISLVFGISYDSPDYDESCTFKISLRNFRSILSWELKNHS
IVPTHYTLTYTMSKPEDLKVKNKNCANTRSFCDLTDEWRSTHEAYVTVLEGFSGNTTLF
SCSHNFWLAIDMSFEPPEFEIVGFTNHINVMVKFSPSIVEEELQFDLSLVIEEQSEGIVVK
HKPEIKGNMMSGNFYIIDKLPNTNYCVSVYLEHSDEQAVIKSPLKCTLLPPGQSESAE
SAKGGIITVFLIALVLTSTVTLKMGYICLRNSLPKVLRRGLAKGWNVAIHRCSHNA
LQSETPELKGSSCLSPSSWDYKRALCP9D
>AP000295.6-003
MLLSQNAFIFRSLNLVLMVYISLVFGISYDSPDYDESCTFKISLRNFRSILSWELKNHS
IVPTHYTLTYTMSKPEDLKVKNKNCANTRSFCDLTDEWRSTHEAYVTVLEGFSGNTTLF
SCSHNFWLAIDMSFEPPEFEIVGFTNHINVMVKFSPSIVEEELQFDLSLVIEEQSEGIVVK
HKPEIKGNMMSGNFYIIDKLPNTNYCVSVYLEHSDEQAVIKSPLKCTLLPPGQSESEFS
>AP000295.6-007
MEHKPEIKGNMMSGNFYIIDKLPNTNYCVSVYLEHSDEQAVIKSPLKCTLLPPGQSESE
AESAKGGIITVFLIALVLTSTVTLKMGYICLRNSLPKVLRRGLAKGWNVAIHRCSH
NALQSETPELKGSSCLSPSSWDYKRALCP9D
>AP000295.6-008
MLLSQNAFIFRSLNLVLMVYISLVFGISYDSPDYDESCTFKISLRNFRSILSWELKNHS
IVPTHYTLTYTMSKPEDLKVKNKNCANTRSFCDLTDEWRSTHEAYVTVLEGFSGNTTLF
SCSHNFWLAIDMSFEPPEFEIVGFTNHINVMVKFSPSIVEEELQFDLSLVIEEQSEGIVVK

```

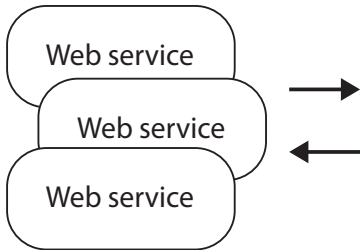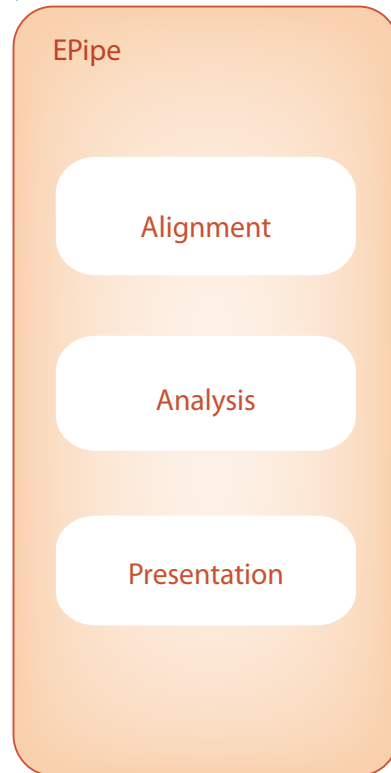

**Output**

Feature summary table

|                | SignalP 3.0a                        | TMHMM                                                                    | Hit to PDB (getstruct)                              | IletPhos                | pfam                             |
|----------------|-------------------------------------|--------------------------------------------------------------------------|-----------------------------------------------------|-------------------------|----------------------------------|
| AP000295.6-001 | Signal peptide? (Y/N) 26 res. (7%)  | TM helix 46 res. (13%)<br>Outside 217 res. (65%)<br>Inside 68 res. (20%) | Matching 210 res. (83%)                             | Predicted 44 res. (13%) | Interfer- 103 res. (31%)<br>bind |
| AP000295.6-003 | Signal peptide? (Y/N) 26 res. (10%) | TM helix 23 res. (9%)<br>Outside 210 res. (87%)<br>Inside 6 res. (2%)    | Matching 212 res. (88%)                             | Predicted 29 res. (12%) | Interfer- 103 res. (43%)<br>bind |
| AP000295.6-007 | (no output)                         | TM helix 23 res. (15%)<br>Outside 68 res. (44%)<br>Inside 62 res. (40%)  | Matching 57 res. (37%)<br>Mismatch(gap) 1 res. (0%) | Predicted 21 res. (13%) | Interfer- 61 res. (39%)<br>bind  |
| AP000295.6-008 | Signal peptide? (Y/N) 26 res. (14%) | TM helix 23 res. (12%)<br>Outside 151 res. (83%)<br>Inside 6 res. (3%)   | Matching 153 res. (85%)                             | Predicted 23 res. (12%) | Interfer- 44 res. (24%)<br>bind  |

2D feature alignment plot

3D structural annotation plot

Isoform 1

Isoform 2

Isoform 3

Isoform 4

The workflow in the Epipe method [8] which is designed to identify functional differences between sequence variants as they are produced by alternative splicing, SNPs, or somatic mutations. The isoforms are first aligned, then analyzed by a large number of feature predictors, and finally differential features are extracted and presented and mapped onto protein structural information if available in PDB.

|           |                     |          |
|-----------|---------------------|----------|
| Sequence1 | Reference KIT_HUMAN | 976 res. |
| Sequence2 | L656P KIT_HUMAN     | 976 res. |
| Sequence3 | G664R KIT_HUMAN     | 976 res. |

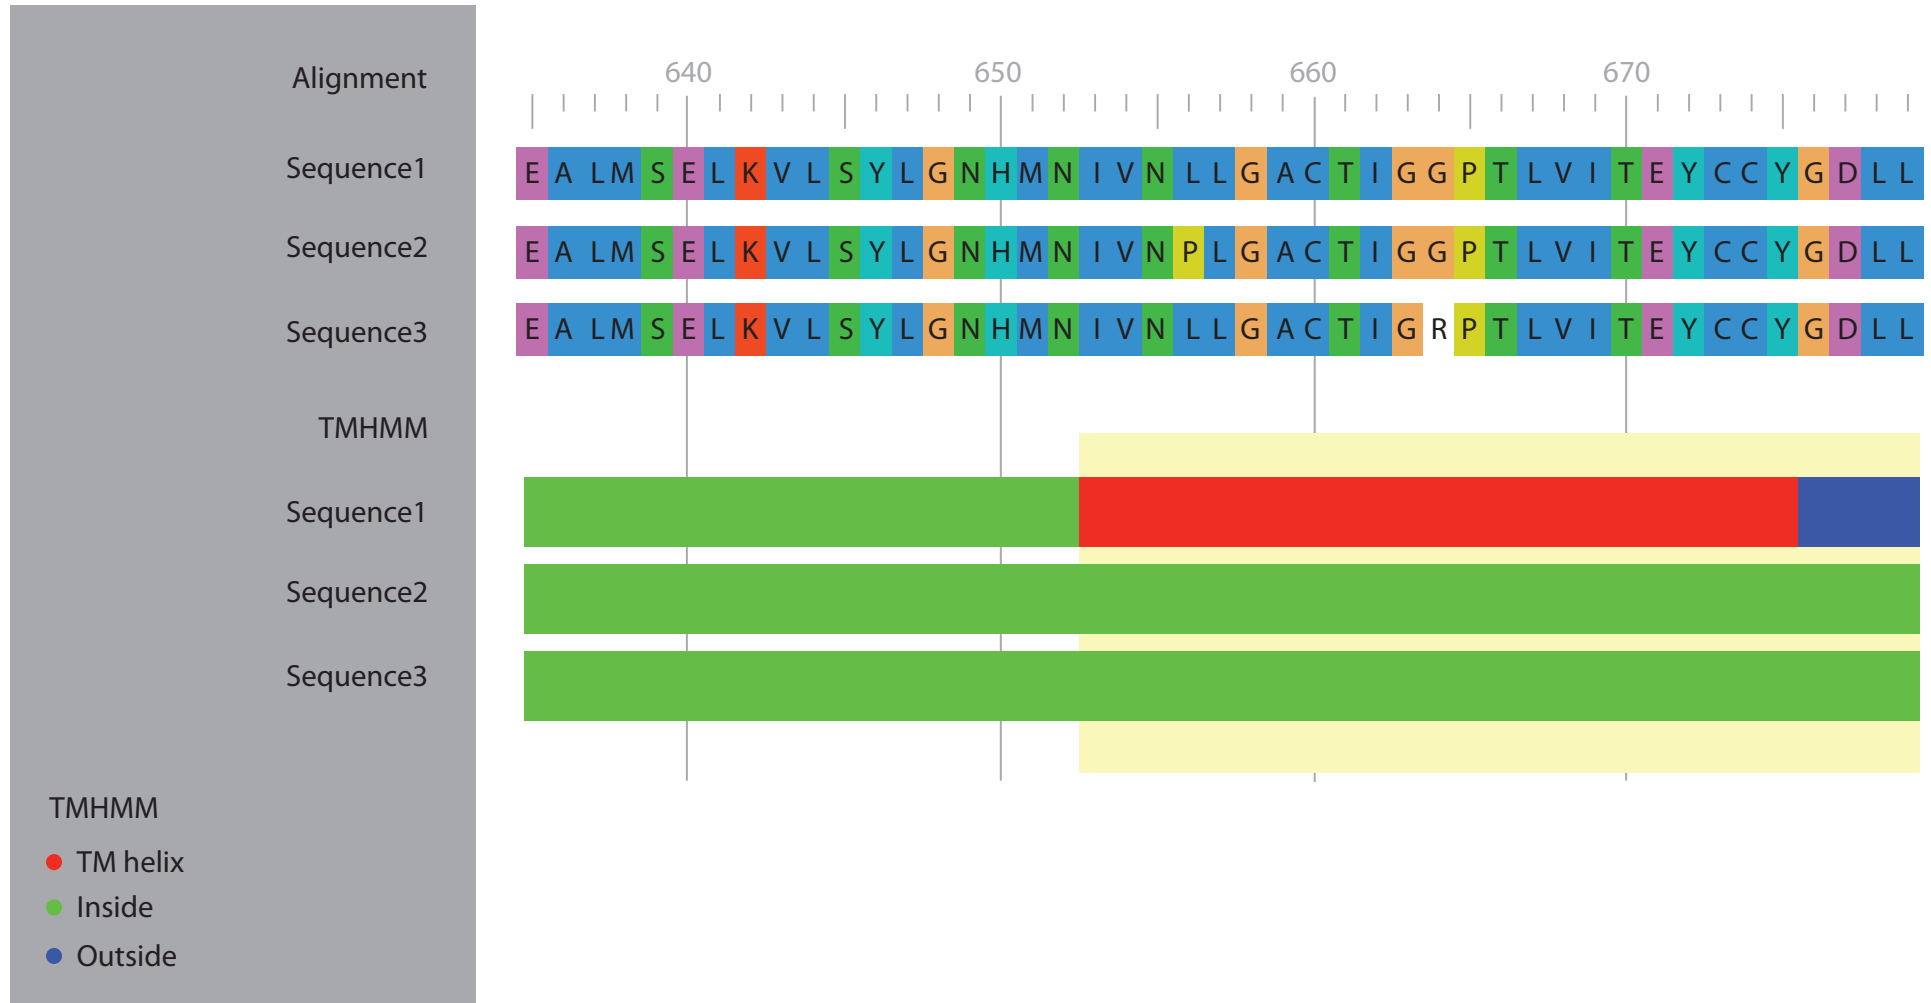

An example output from Epipe for variants of the receptor for stem-cell growth factor (mast-cell growth factor) KIT\_Human, which has tyrosine protein kinase activity. Binding of ligands leads to the autophosphorylation of KIT and its association with substrates such as phosphatidylinositol 3-kinase (PI3K). The prediction shows that several single amino-acid changes can lead to a complete shift in the prediction of the membrane protein topology using the TMHMM method [36].
